1           **Molecular and functional characterization of the mouse**

2                           **intracardiac nervous system**

3   Short title: mouse intracardiac nervous system characterization

4   Guénaëlle Lizot (PhD student)<sup>1</sup>

5   Côme Pasqualin (PhD)<sup>1</sup>

6   Audrey Tissot (Msc)<sup>2</sup>

7   Stéphane Pagès (PhD)<sup>2</sup>

8   Aurélien Chatelier (PhD)<sup>1</sup>

9       1. PReTI laboratory, EA 7349 University of Poitiers, France

10      2. Wyss Center for Bio and Neuroengineering, Campus Biotech, Geneva,

11       Switzerland

12   Corresponding author

13   Aurélien Chatelier PhD

14   EA 7349, Pôle Biologie Santé, Bâtiment B36

15   1 rue Georges Bonnet, TSA 51106 86073 POITIERS Cedex9, France.

16   Phone: +33 (0)5.49.45.37.47

17   E-mail: aurelien.chatelier@univ-poitiers.fr

18   no conflicts reported by the authors

19   Word count:5000

## 20 **Abstract**

### 21 **Background**

22 The intracardiac nervous system (ICNS) refers to clusters of neurons, located within the heart, that  
23 participate to the neuronal regulation of cardiac functions and are involved in the initiation of cardiac  
24 arrhythmias. Therefore, deciphering the role of the ICNS in cardiac physiology and physiopathology is  
25 mandatory. Whereas transgenic mouse models represent powerful tools to reach this goal, the mouse  
26 ICNS is still poorly characterized.

### 27 **Objective**

28 The objective of the present study was to provide a phenotypic, electrophysiological and  
29 pharmacological characterization of the mouse ICNS.

### 30 **Methods**

31 Global cardiac innervation and phenotypic diversity was investigated by performing  
32 immunohistochemistry on cleared murine heart and on tissue sections. Patch clamp technique was used  
33 for electrophysiological and pharmacological characterization of isolated mouse intracardiac neurons.

### 34 **Results**

35 We identified the expression of 7 distinct neuronal markers within mouse intracardiac neurons  
36 demonstrating the neurochemical diversity of this network. Of note, we described for the first time in  
37 mouse, the existence of neuron expressing the calcium binding protein calbindin, the neuropeptide Y  
38 (NPY) and the cocaine and amphetamine regulated transcript (CART) peptide. Electrophysiological  
39 studies also revealed the existence of two different neuronal population based on their electrical  
40 behavior. Finally, we demonstrated that these neurons can be modulated by several neuromodulators.

### 41 **Conclusion**

42 This study demonstrated that mouse ICNS shares similar molecular and functional complexity to that  
43 of other species and therefore is a suitable model to decipher the role of individual neuronal subtypes in  
44 the modulation of cardiac function and in the initiation of cardiac arrhythmias.

45 **Keywords:** Intrinsic cardiac ganglia, Autonomic nervous system, Heart, cardiac innervation, cardiac  
46 electrophysiology.

## 47 **Introduction**

48 Neural control of the heart involves central and peripheral neurons that act interdependently to modulate  
49 cardiac parameters such as heart rate, conduction velocity or contractility. As part of this cardiac  
50 neuronal regulation, the intrinsic cardiac nervous system (ICNS) is receiving growing attention. Indeed,  
51 whereas they were initially considered as simple parasympathetic postganglionic neurons, studies  
52 conducted over the past 30 years suggested a more complex organization of intracardiac neurons,  
53 involving the existence of sensory, local regulatory and motor neurons within intracardiac ganglia,  
54 leading to the concept of “little brain on the heart”<sup>1</sup>.

55 Phenotypic studies have been conducted in many species to try to identify several putative functional  
56 neuronal subpopulations. Beside cholinergic phenotype, the presence of catecholaminergic,  
57 glutamatergic and nitregic phenotypes have been described within intracardiac neurons<sup>2–10</sup>. This  
58 neurochemical diversity have also been illustrated by the expression of several neuropeptides such as  
59 neuropeptide Y (NPY), vasoactive intestinal peptide (VIP), pituitary adenylate cyclase-activating  
60 polypeptide, somatostatin (SST), or cocaine and amphetamine regulated transcript (CART) peptide<sup>3,6,10–</sup>  
61 <sup>13</sup>.

62 From a functional point of view, several studies mainly conducted in rat and guinea pig have also  
63 identified various types of cardiac neurons based on their electrical membrane properties<sup>14–17</sup>. In the  
64 guinea pig, electrophysiological experiments combined to a morphological characterization of  
65 intracardiac neurons gave rise to the identification of three distinct types of neurons including a putative  
66 sensory one<sup>16</sup>. However, we are still lacking evidence demonstrating that this neuronal diversity is  
67 associated with a functional specialization of neurons. Such a characterization would bring essential  
68 information to assess the impact of cardiac neuronal network in cardiac physiology. This would be even  
69 more important since ICNS have also been implicated in cardiac arrhythmias. For example, atrial  
70 fibrillation (AF) have been correlated with excessive activity of intracardiac neurons<sup>18</sup> and specific  
71 stimulation of cardiac ganglia has been able to trigger AF<sup>19</sup>. Moreover, ablation of ganglionated plexus  
72 has been shown to reduce AF and is now one of the strategies used in therapy<sup>20</sup>. Deciphering the ICNS

73 modulations of cardiac function through the role of individual neuronal subtypes is therefore essential  
74 but was for a long time limited by technical approaches available.

75 Recent advances in genetic engineering have opened novel opportunities to improve our comprehension  
76 of the ICNS and its pathophysiological involvement in arrhythmias. For example, cre-lox systems  
77 combined with optogenetic or DREADDs approaches represent a powerful tool to address more  
78 precisely the function of one particular subtypes of intracardiac neurons. However, because these  
79 technologies are almost only available in mouse models, a better understanding of the mouse ICNS is  
80 required.

81 To date, the few existing studies on mouse cardiac neurons seem to confirm the phenotypic  
82 heterogeneity observed in other models. Indeed, choline acetyltransferase (ChAT), tyrosine hydroxylase  
83 (TH) and neuronal nitric oxide synthase (nNOS) have been reported in these neurons<sup>2,7</sup>. However, to  
84 our knowledge, the expression of other neuronal markers has not been yet investigated. Moreover, very  
85 little is known regarding the electrical and pharmacological properties of mouse cardiac neurons with  
86 only one study investigating this aspect<sup>21</sup>.

87 This study was therefore designed in an effort to better characterize the phenotypic, electrophysiological  
88 and pharmacological properties of the mouse ICNS. Immunohistochemical experiments were conducted  
89 on cleared whole murine hearts and on tissue sections allowing us to (1) quantify global autonomic  
90 cardiac innervation and (2) investigate the phenotypic heterogeneity of mouse intracardiac neurons. This  
91 examination was further proceed with the characterization of passive and active electrical properties as  
92 well as pharmacological responses of isolated mouse cardiac neurons using the patch clamp technique.

## 93 **Methods**

### 94 **Animals**

95 Experimental procedures were performed using adult C57/BL6 mice (8-20 weeks) of either gender in  
96 accordance with the European Union Directive (2010/63/EU) on the protection of animals used for  
97 scientific purposes. The protocol was approved by the local ethics committee “COMETHEA”.

### 98 **iDISCO heart clearing**

99 Mouse hearts were stained and cleared using a modified iDISCO+ protocol<sup>22,23</sup>. Images were acquired  
100 with the ALICE’s custom-built mesoSPIM microscope at Wyss Center, Geneva. (See supplement).

### 101 **Immunohistochemistry**

102 Immunohistochemistry was performed on 40–50  $\mu\text{m}$  heart sections and acquired using a confocal laser  
103 scanning microscope (FV3000 Olympus) (See supplement).

### 104 **Neuron dissociation**

105 Ganglia were enzymatically digested with 2mL HBSS containing 3mg/mL collagenase typeII  
106 (Worthington), 7.5mg/mL dispaseII and 0.25 mg/mL DNaseI (30mn at 37°C). This was followed by  
107 an incubation in 2mL trypsin-EDTA 0.25% supplemented with 0.25 mg/mL DNaseI (35mn at 37°C).  
108 Finally, cells were gently triturated with fire-polished Pasteur pipettes coated with SVF and plated on  
109 laminin-coated 35mm Petri dishes.

### 110 **Electrophysiology**

111 Electrical membrane properties of isolated cardiac neurons were determined using the whole-cell  
112 configuration of the patch clamp technique. Recordings were carried out at room temperature within 30  
113 hours following isolation. Data acquisition and analysis were performed using pClamp software (v11,  
114 Molecular devices, San Jose, California, USA).

### 115 **Statistical analysis**

116 Statistical analysis was performed using GraphPad Prism (San Diego, California, USA). Data are  
117 presented as mean $\pm$ SEM. Mann-Whitney test was used for statistical comparison.

## 118 **Results**

### 119 **Cholinergic and catecholaminergic innervation of mouse heart**

120 Neural control of the heart involved a combination of peripheral and intrinsic neural structures<sup>1</sup>. In order  
121 to investigate global cardiac innervation in mice, we performed immunodetection of cholinergic (ChAT-  
122 IR) and catecholaminergic (TH-IR) structures on cleared murine hearts.

123 This approach allowed us to appreciate the dense network of TH-IR nerves innervating mouse hearts  
124 (supplementary movie). Large bundles of nerves accessed the heart through the heart hilum, at the base  
125 of the heart, and extended toward the dorsal and the ventral side of both ventricles (fig.1a). Ventricular  
126 innervation was mainly located at the epicardial surface even if thinner fibers could be seen deeper  
127 through the heart wall, especially coursing along the interventricular septum (supplementary movie).

128 ChAT-IR was used to identify intrinsic cardiac ganglia. As seen in figure 1, ganglia were exclusively  
129 located in the dorsal side of the heart, in close proximity to the pulmonary veins. The mean number of  
130 ganglia per heart were  $18 \pm 3$  ranging from 13 to 23 (n=3, fig.1d). Most of them were characterized by  
131 TH-IR puncta allowing us to see individual neurons (fig.1a insets 1 and 2). Unlike TH, ChAT-IR fibers  
132 were almost exclusively located around ganglionated plexus where they interconnected multiple  
133 ganglia.

134 Global cardiac innervation was further studied by developing a volumetric quantification approach using  
135 Imaris. Based on ChAT staining, the volume of each individual ganglion was estimated resulting in a  
136 total ganglion volume of  $1.95 \pm 0.17 \cdot 10^7 \mu\text{m}^3$  (n=3; fig.1b,e) per heart. We also developed an automatic  
137 pipeline in ImageJ to quantify the total length of TH-IR nerve fibers innervating both ventricles and  
138 found a total length of  $1.68 \pm 0.21 \cdot 10^5 \mu\text{m}$  (n=3; fig.1c,f).

### 139 **Neurochemical phenotype of mouse intracardiac neurons**

140 Immunodetection of the cholinergic marker ChAT confirmed the prominent cholinergic phenotype of  
141 intrinsic cardiac neurons (98.7%). This marker also labeled intra and interganglionic nerves fibers as

142 well as varicose terminals surrounding neurons. Immunoreactivity for TH was detected in approximately  
143 30% of cardiac neurons and in numerous nerves fibers (fig.2a-c).

144 Except the widely established cholinergic and catecholaminergic markers we were able to observe a  
145 large proportion of neurons (46%) expressing the calcium binding protein calbindin D-28k (calbindin).  
146 In neuronal somata, calbindin-IR was always observed in cytoplasm and was often accompanied by a  
147 strong nucleus staining (fig.2d-f). Calbindin-IR was also present in multiple intra and inter-ganglionic  
148 nerve fibers and occasionally in pericellular baskets surrounding neuronal somata (fig.2d inset).  
149 Calbindin neurons were always co stained by ChAT and 11.8% of cardiac neurons showed  
150 immunoreactivity for calbindin, ChAT and TH (Table1).

151 A small population of neurons stained with nNOS, the neuronal enzyme responsible for the synthesis of  
152 NO, was also present in cardiac ganglia. These neurons were not present in all ganglia and account for  
153 only 2% of total neurons (fig.2g-i). The majority but not all nNOS-IR somata coexpressed ChAT.

154 In very rare occasions, we were able to observe immunoreactivity for the vesicular glutamate transporter  
155 2 (VGLUT2) (fig.2j-l). However, no somata appeared stained by the other vesicular glutamate  
156 transporter VGLUT1. Finally, we were unable to observe any GABAergic nor serotonergic phenotype  
157 despite the use of different markers (Gad67, GABA, TPH2).

158 Intracardiac neurons have been shown to express several neuropeptides in various species, especially in  
159 rodents<sup>6,11</sup>. In mouse hearts, we observed a large proportion of neuronal somata immunoreactive for  
160 NPY (67%) and CART peptides (61%), however, due to antibody crossreactions, we didn't quantify the  
161 number of neurons coexpressing both peptides. In somata, these two staining appeared as granular with  
162 a perinuclear localization suggesting a localization in the endoplasmic reticulum and the Golgi apparatus  
163 (fig.3). Numerous intra and interganglionic nerve fibers were also labeled by these two peptides.

164 Calcitonin Gene Related Peptide-IR (CGRP) and Substance P-IR (SP), two peptides characteristic of  
165 sensory neurons, were also observed in nerve fibers but never in neuronal somata (fig.3a-f). Both  
166 peptides were frequently colocalized although SP-IR nerves fibers were far less numerous. IR for SST  
167 and VIP was also tested, however we were unable to see any labeling for these neuropeptides.

## 168 **Electrophysiological properties of mouse intracardiac neurons**

169 After isolation, cardiac neurons were identified as cells with rounded cell body with numerous processes  
170 extended from it (fig.4a). The majority of neurons appeared as multipolar, even if some uni and bipolar  
171 neurons were also observed.

172 Passive and active electrical membrane properties of isolated mouse cardiac neurons were determined  
173 using the patch clamp technique in current clamp mode. At rest, isolated cardiac neurons were defined  
174 by a membrane potential of  $-61.3 \pm 0.8 \text{ mV}$  ( $n=42$ ), an input resistance of  $1420.1 \pm 70.8 \text{ M}\Omega$  ( $n=36$ ) and a  
175 membrane capacitance of  $33.4 \pm 1.4 \text{ pF}$  ( $n=39$ ) (Supplementary table2).

176 In our conditions, no spontaneous firing activity was observed. Investigation of discharge characteristics  
177 revealed two distinct profiles. 81.4% of neurons showed limited firing activity (phasic neurons)  
178 characterized by a maximum of 1 to 3 action potentials (AP) at the onset of the stimulus while 18.6% of  
179 neurons exhibited adapting firing behavior (fig.4b-c). We also determined that adapting neurons were  
180 defined by a lower rheobase ( $37.1 \pm 2.9 \text{ pA}$ ;  $n=7$ ) compared to phasic neurons ( $66.3 \pm 3.9 \text{ pA}$ ;  $n=35$ ;  
181  $p < 0.0005$ , fig.4d). Moreover, adapting neurons displayed a shorter ( $71.5 \pm 6.4 \text{ ms}$  (*adapting*) vs  
182  $151.6 \pm 22.2 \text{ ms}$  (*phasic*);  $p < 0.05$ , fig.4e) and smaller ( $5.6 \pm 0.3 \text{ mV}$  (*adapting*) vs  $9.2 \pm 0.6 \text{ mV}$  (*phasic*);  
183  $p < 0.05$ , fig.4f) afterhyperpolarization (AHP).

184 Upon brief injection of suprathreshold depolarizing current, AP exhibited an amplitude of  $134.2 \pm 1.7 \text{ mV}$   
185 and a half duration of  $1.84 \pm 0.04 \text{ ms}$  ( $n=38$ ). Approximately half of APs were followed by AHP with an  
186 amplitude of  $8.3 \pm 2.6 \text{ mV}$  while the other neurons did not exhibit any AHP (fig.5a-e).  
187 Electrophysiological properties of mouse intracardiac neurons are summarized in supplementary table2.

## 188 **Pharmacological response of mouse intracardiac neurons**

189 Since the ICNS is under the dependence of several modulators<sup>24</sup>, we investigated the pharmacological  
190 response of isolated mouse cardiac neurons to known peripheral neuromodulators.

191 All tested neurons ( $n=21$ ) exhibited membrane voltage and current response to acetylcholine (Ach)  
192 perfusion and the resulting inward current were sufficient to trigger AP (fig.6a). The superfusion of Ach  
193 resulted in the development of a large inward current that showed a decay in amplitude before the end  
194 of the drug application, probably due to channel desensitization.



195 The expression of several purinergic receptors have been described in rat cardiac neurons<sup>25</sup> and  
196 adenosine triphosphate (ATP) and other purinergic compounds have been reported to modulate canine  
197 intracardiac neurons<sup>24</sup>. In our study, exogenous application of ATP was accompanied by a strong  
198 membrane depolarization and AP in all tested neurons (n=4) (fig.5). In voltage clamp (HP=-50mV),  
199 ATP evoked a rapidly activating, sustained inward current, characteristic of P2X receptors activation.  
200 In our study, perfusion of bradykinin (BK) was able to slowly depolarize mouse cardiac neurons without  
201 eliciting AP (0.2 $\mu$ M: 8.4 $\pm$ 1.1mV (n=7) ; 0.5 $\mu$ M: 13.0 $\pm$ 2.4mV (n=8)). This was confirmed by the  
202 observation of a very slow activating inward current of small amplitude after BK exposure in voltage  
203 clamp experiments (fig.6c).

## 204 **Discussion**

205 In this study, by using multi-technique approaches, we provide for the first time a detailed report of  
206 anatomic, phenotypic, electrophysiological as well as pharmacological properties of the mouse ICNS.

### 207 **Cholinergic and catecholaminergic innervation of mouse heart**

208 For the past 30 years, cardiac innervation and ICNS have been studied in a variety of species using tissue  
209 sections or whole-mount approaches. Although these techniques have brought a lot of information  
210 regarding the cardiac autonomic innervation, they suffer from some limitations as they imply loss of  
211 sample integrity or only report superficial information. The recent development of optical clearing  
212 techniques combined to advances in 3D imaging of large-scale specimen have overcome these  
213 limitations, opening new opportunities to study global cardiac innervation.

214 We took advantage of the iDISCO clearing method to visualize and quantify in three dimensions the  
215 sympathetic and parasympathetic innervation of the mouse heart. By using this approach, we have been  
216 able to determine the exact location and number of cardiac ganglia in the whole non-sectioned murine  
217 heart. Our results are in accordance with Rysevaite et al.<sup>26</sup> who reported a mean number of 19 $\pm$ 3 ganglia.  
218 Since three dimensions analysis of ganglia was missing in the literature, we employed a volumetric  
219 approach enabling the quantification of ganglion size and found that cumulative ganglia occupied a  
220 volume of 0.02mm<sup>3</sup>. We also developed an automatic pipeline in ImageJ to quantify the total length of

221 nerve fibers innervating the heart. Our approach is complementary to the remarkable work done by  
222 Rajendran et al.<sup>27</sup> who developed a clearing-imaging-analysis pipeline to assess diameter and orientation  
223 of nerve fibers innervating the mouse heart. This anatomical description of neuronal cardiac circuits will  
224 bring useful information for the comprehension of the autonomic cardiac innervation as well as for the  
225 identification of abnormal cardiac innervation in pathological states as it has been described in  
226 myocardial infarction or in cardiac autonomic neuropathy<sup>28,29</sup>.

### 227 **Neurochemical phenotype of mouse intracardiac neurons**

228 So far, very little information was known about the neurochemical diversity of intracardiac neurons in  
229 mouse, with only 3 different neuronal markers (ChAT, TH and nNOS) identified<sup>2,7,8</sup>. Our results  
230 confirmed that almost all intracardiac neurons expressed the cholinergic marker ChAT and that almost  
231 30% of them co-expressed ChAT and TH<sup>7,8</sup>. We also found a small population of nitrergic neurons  
232 which is consistent with previous investigations that have reported such a phenotype in rat, guinea pig,  
233 rabbit and human<sup>3-5</sup>.

234 We described for the first time the expression of 4 additional markers within somata of mouse  
235 intracardiac neurons demonstrating that this species is also characterized by a relative phenotypic  
236 diversity as it has been reported in others mammals<sup>3,5,10</sup>. Indeed, we emphasized the existence of neurons  
237 expressing the calbindin, NPY and CART peptides and to a lesser extent glutamatergic neurons. A large  
238 proportion (46%) of mouse intracardiac neurons express the calcium binding protein calbindin. To date,  
239 only one study identified such neurons in rat heart with a proportion of only 7% of total neurons<sup>3</sup>. The  
240 expression of this protein has been reported in central and peripheral neurons and is often used as a  
241 marker to discriminate different functional subpopulation of neurons such as sensory neurons<sup>30</sup>. We also  
242 observed a lot of intra- and inter-ganglionic fibers as well as terminals surrounding cell bodies that were  
243 immunoreactive for calbindin, suggesting that calbindin-expressing neurons may be crucial components  
244 of local reflexes. In the future, it would be interesting to investigate whether the expression of this protein  
245 is associated with any specialized function.

246 Recently, glutamatergic neurons immunoreactive for VGLUT1, VGLUT2 and glutaminase, the  
247 synthetic enzyme for glutamate, have been found within the ICNS of rat<sup>9</sup>. In our study, we occasionally  
248 observed neurons immunoreactive for VGLUT2 but we failed to detect any VGLUT1 immunoreactivity.  
249 Therefore we suggest that in mouse, glutamatergic intracardiac neurons may exist but does not represent  
250 a significant neuronal population.

251 The expression of a variety of neuropeptides also account for the neurochemical diversity of intracardiac  
252 neurons, especially in rodents<sup>6,11</sup>. However, except the description of sensory fibers immunoreactive for  
253 CGRP and SP, the expression of other neuropeptides has not been investigated in mouse<sup>7</sup>. Here, we  
254 identified the expression of two neuropeptides, NPY and CART, within mouse intracardiac neurons.  
255 The expression of NPY within these neurons was not surprising since it appeared to be widely distributed  
256 in the autonomic nervous system and its cardiovascular effects have been well documented<sup>31</sup>.

257 CART peptide expression has been found to concern only a small number of cardiac neurons in the  
258 guinea pig while it has been observed in 46% of neuron in the rat<sup>11,12</sup>. This proportion is even more  
259 important in mouse, with 61% of neurons showing immunoreactivity for CART. This peptide has been  
260 extensively studied in the enteric nervous system where it appeared to be expressed in many neurons  
261 but experimental evidence elucidating its biological function are still lacking<sup>32</sup>. Further studies should  
262 try to clarify its function within the cardiac context.

### 263 **Electrophysiological and pharmacological properties of mouse intracardiac neurons**

264 The complex organization of the ICNS has been further supported by the examination of its  
265 electrophysiological properties. Indeed, based on their electrical behavior, different subtypes of neurons  
266 have been identified within mammals, demonstrating that intracardiac neurons were not forming a  
267 homogeneous population<sup>14,16,17</sup>. Here, we report the first detailed investigation of passive and active  
268 electrical properties of mouse intracardiac neurons. These neurons appeared to have uniform resting  
269 membrane and AP properties. However, by studying their firing activity we identified two distinct  
270 neuronal populations as observed previously<sup>15,17,21</sup>. Indeed, while the majority of neurons were classified  
271 as phasic due to their limited firing activity, a small proportion of neurons were able to discharge more

272 APs and were defined as adapting neurons. Phasic neurons had a significant higher rheobase as well as  
273 higher AHP amplitude and duration compared to the adapting one, which confirm the existence of two  
274 types of neurons displaying different functional characteristic in terms of excitability. Little information  
275 is known about the different ionic channels expressed by intracardiac neurons, especially in the mouse,  
276 hence, it would be interesting to closely investigate the molecular determinants of these two types of  
277 electrical behaviors.

278 A significant number of studies have revealed the diversity of neuromodulatory sources of intracardiac  
279 neurons which further suggest that they can act as integrative centers. In the dog, neuronal activity have  
280 been found to be regulated by mechanical as well as chemical stimuli<sup>27</sup>. Similarly, a variety of substances  
281 have been reported to modulate excitability of intracardiac neurons in rat and guinea pig<sup>13,24,33</sup>. However  
282 the pharmacological modulation of mouse intracardiac neurons have never been investigated. Here, we  
283 demonstrated that mouse cardiac neurons showed responsiveness to Ach, ATP and BK, suggesting that  
284 they can be modulated by a variety of stimuli. In our experiments, BK induced a small inward current  
285 associated to a slight membrane depolarization. This indicates that BK receptors are present in mouse  
286 cardiac neurons but their stimulation was not sufficient in our conditions to trigger AP firing as observed  
287 in rat<sup>33</sup>.

## 288 **Conclusion**

289 In conclusion, our study is the first detailed report providing phenotypic, electrophysiological and  
290 pharmacological characterization of mouse intracardiac neurons. Taken together our results  
291 demonstrated that the mouse ICNS shares similar complexity in term of phenotypic,  
292 electrophysiological as well as pharmacological properties to that of other species. ICNS complexity  
293 deserves to be deciphered since there is growing evidences that ICNS plays an essential role in cardiac  
294 modulations and in the initiation and maintenance of cardiac arrhythmias. The emergence of new genetic  
295 tools such as DREADDs and optogenetics raise new opportunities to control the activity of specific  
296 neurons within a global network. Therefore, these tools represent an excellent approach to understand  
297 the role of targeted neurons in global cardiac modulation as described in the recent review of Scalco et

298 al.<sup>34</sup>. However, these transgenic technologies are almost only available in mouse, and despite the  
299 extensive use of mouse models in cardiovascular research, little was known about their ICNS. In this  
300 context, our study is paving the way for future investigations using a combination of cre-mice systems  
301 and DREADD/optogenetic tools in order to decipher the functional organization of the ICNS as well as  
302 its implication in pathological states such as arrhythmias.

### 303 **Author Contributions**

304 G.L and A.C performed and analyzed the experiments. C.P conceptualized the imageJ pipeline. A.T  
305 performed technical imaging acquisition. G.L, C.P, S.P and A.C wrote the manuscript. A.C  
306 conceptualized and supervised the study.

307 **Acknowledgements** This work has benefited from the facilities of ImageUP platform (University of  
308 Poitiers) and the technical assistance of Anne Cantereau, Christophe Magaud and Cedric Bauer. We also  
309 thank Laura Batti for her help in the analysis of lightsheet images.

### 310 **Funding**

311 This work was supported by FRM (DPC20171138946, FDT202106012947).

312 **Table 1. Neurochemical profile of mouse intracardiac neurons.**

| Neurochemical phenotype | Percentage (number of profiles) | Multiple phenotype (% of total) |
|-------------------------|---------------------------------|---------------------------------|
| ChAT                    | 98,7%                           |                                 |
| TH                      | 28,8% (251/873)                 | 27,9% are ChAT/TH               |
| NPY                     | 66,5% (581/874)                 |                                 |
| nNOS                    | 1,7% (10/577)                   |                                 |
| Calb                    | 45,7% (596/1305)                | 11,8% are Calb/ChAT/TH          |
| CART                    | 60,8% (578/950)                 |                                 |

313

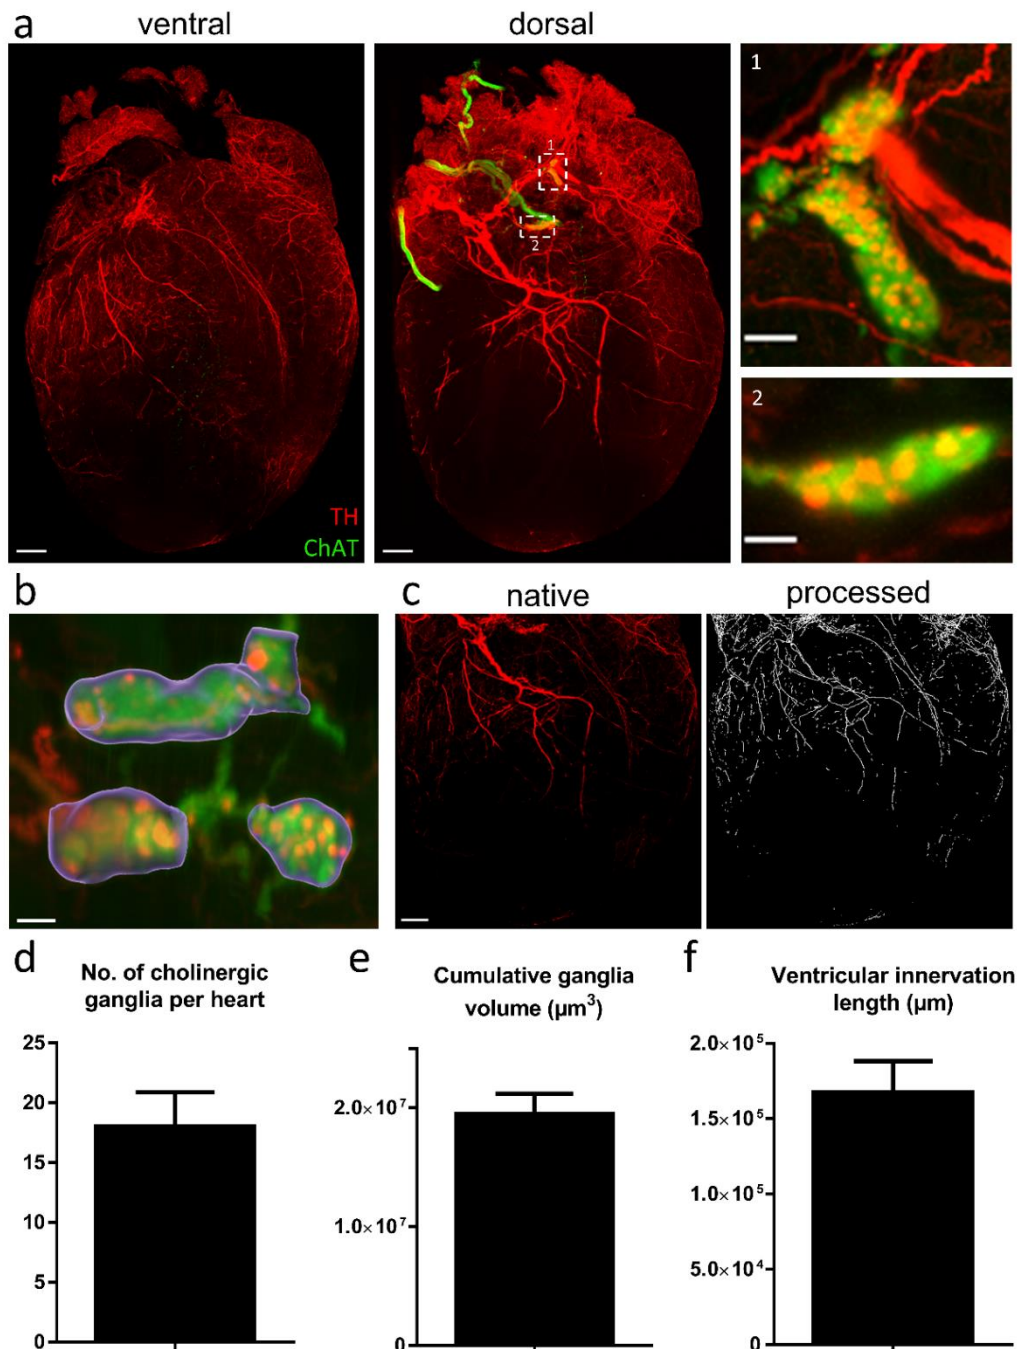

314 **Figure 1. Cholinergic and catecholaminergic cardiac innervation.** a) 3D projections of the ventral  
315 (2500 $\mu\text{m}$  z-stack) and dorsal side of a cleared heart (2440 $\mu\text{m}$  z-stack) with TH (red) and ChAT (green)  
316 staining. Magnification of ganglia are presented in inset 1 and 2. (b-c) 3D image processing used for the  
317 quantification of ganglia volume (purple) and ventricular innervation (white). (d-f) Determination of the  
318 total number of ganglia per heart (d), the cumulative ganglion volume (e) and the total length of  
319 adrenergic fibers innervating both ventricles (f). Scale bars are 500 $\mu\text{m}$  (a(ventral and dorsal) and c) and  
320 100 $\mu\text{m}$  (a(insets 1 and 2) and b).

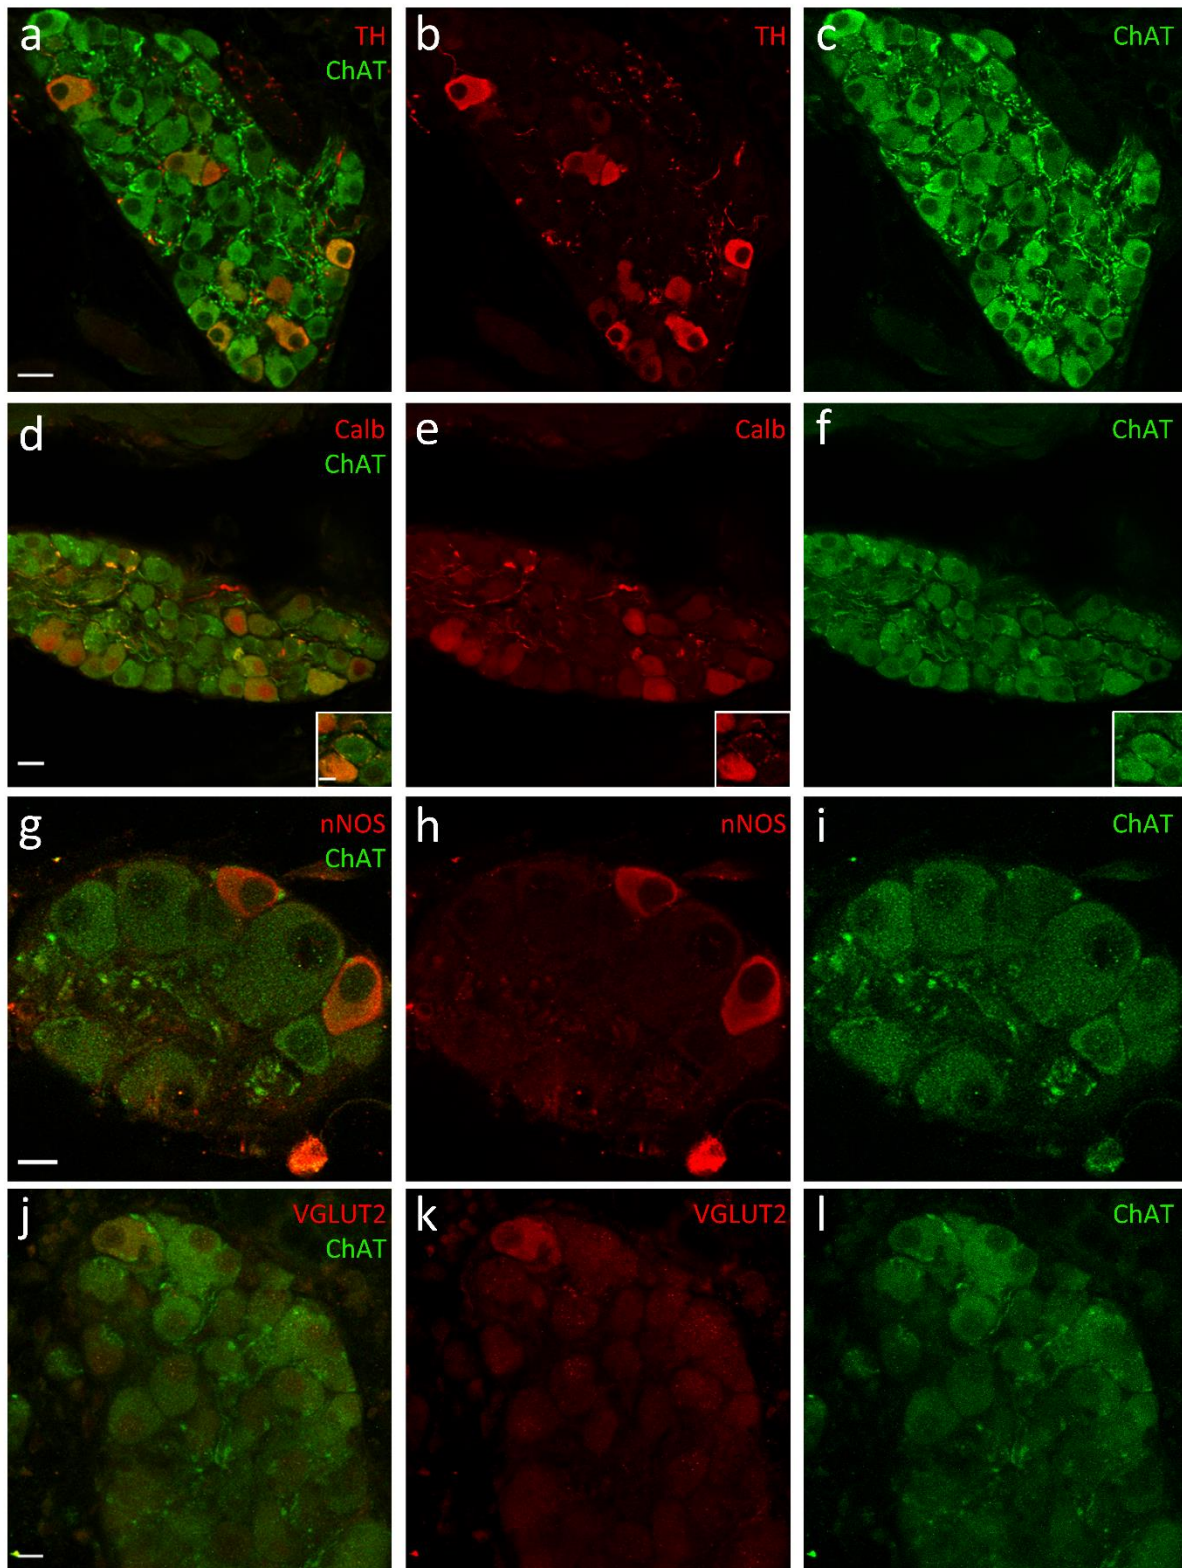

321 **Figure 2. Phenotypic properties of intracardiac neurons.** Confocal images of sections of cardiac  
322 ganglia immunostained with TH (a-c), calbindin (d-f), nNOS (g-i), VGLUT2 (j-l), and ChAT. Insets in  
323 d-f show typical calbindin-IR pericellular baskets surrounding a neuronal somata. Scale bars are 10µm  
324 (inset d, g-i and j-l) and 20µm (all others).



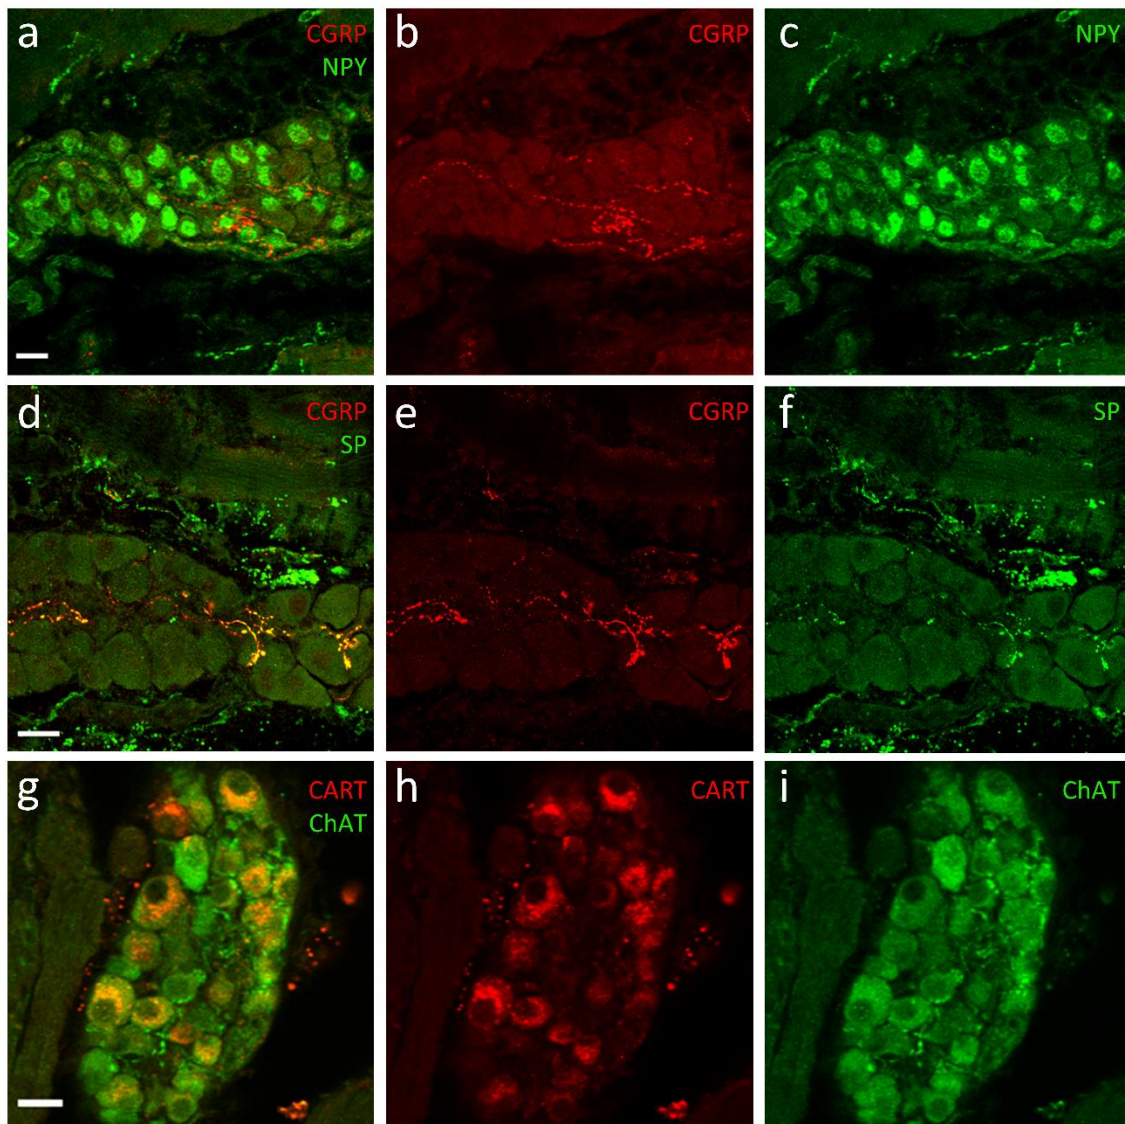

325 **Figure 3. Peptide expression in mouse intracardiac neurons.** Confocal images of sections of cardiac  
326 ganglia immunostained with NPY and CGRP (a-c), SP and CGRP (d-f) and CART (d-f). Scale bars are  
327 20µm.

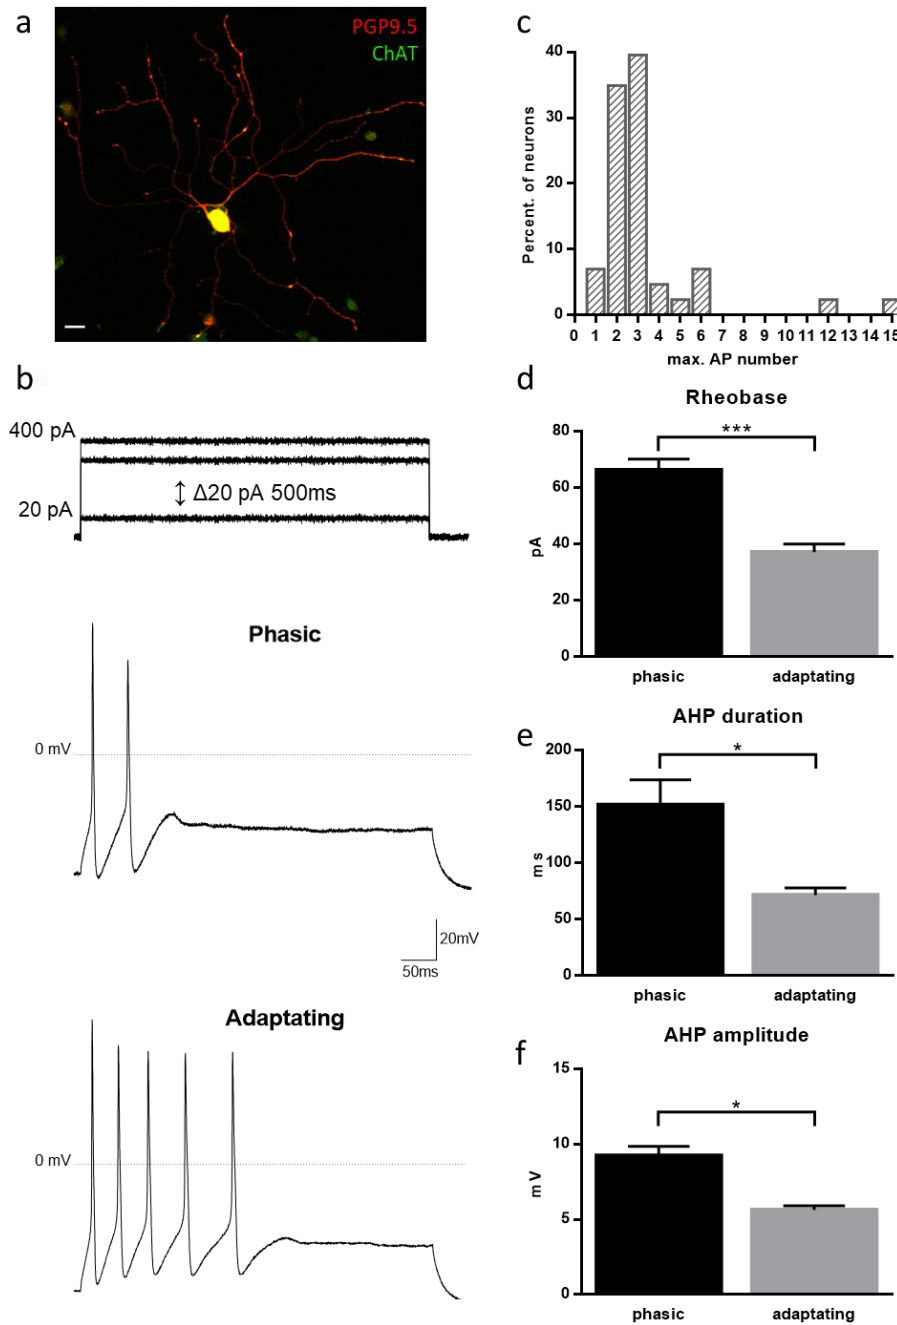

328

329 **Figure 4. Action potential discharge profiles in dissociated mouse intracardiac neurons. (a)**

330 Isolated cardiac mouse neuron costained with the neuronal marker PGP9.5 and ChAT.(b) Maximum

331 discharge of AP observed in two distinct neurons in response to 500ms depolarizing current injection

332 from 20 to 400pA ( $\Delta 20$ pA). Upper trace represents AP obtained in a phasic neuron whereas lower trace

333 was obtained in an adapting one (c) Distribution of the maximum number of AP recorded with the

334 stimulation protocol presented in a. (d) Determination of the rheobase of phasic (n=35) versus adapting

335 neurons (n=7) ( $p < 0,0005$ ) (e-f) Determination of the duration and amplitude of AHP in phasic (n=14)

336 versus adapting (n=4) neurons ( $p < 0,05$ ) with the stimulation protocol used in figure5.

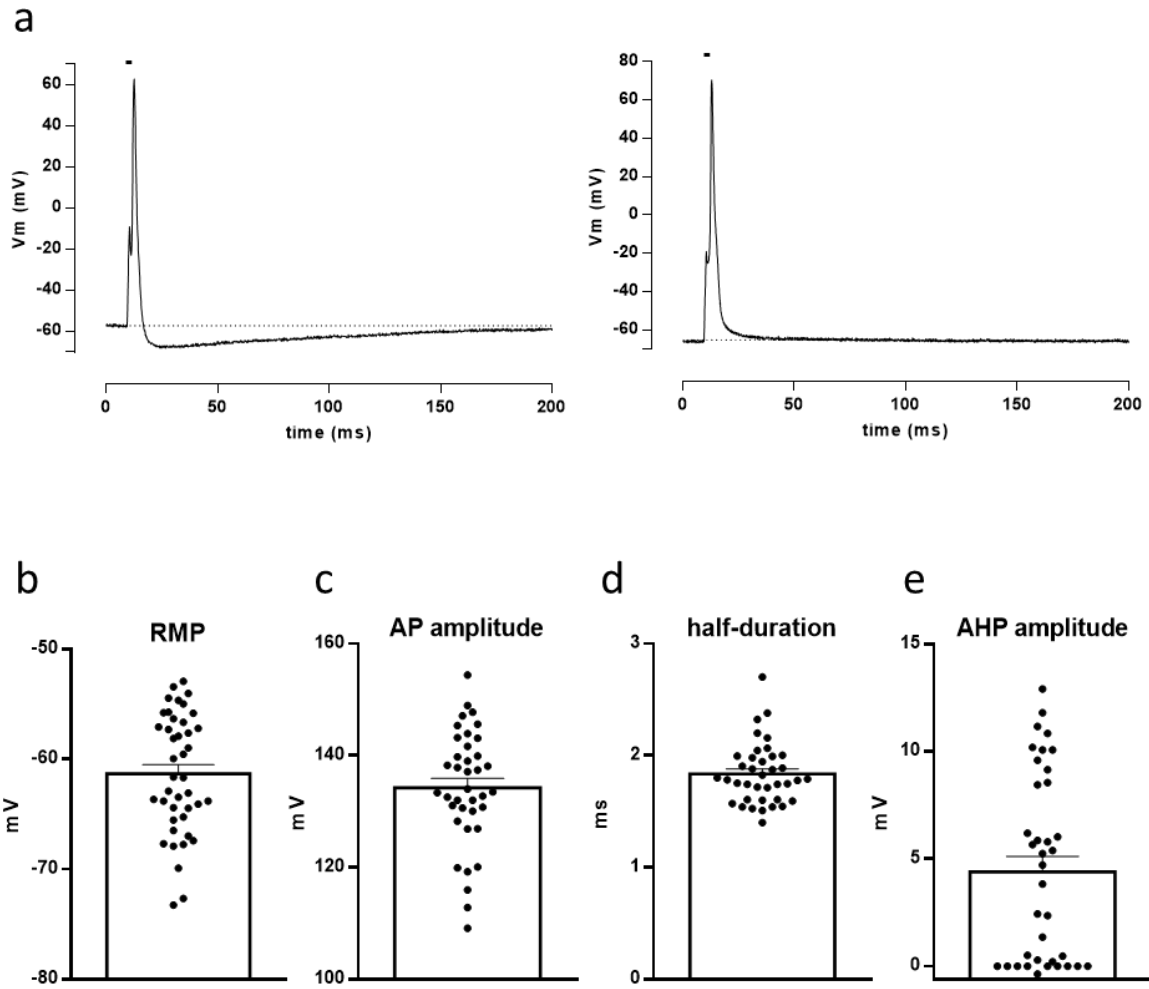

337

338 **Figure 5. Action potential properties in mouse intracardiac neurons.** Typical AP recorded in  
339 response to a brief injection (2ms, black line) of subthreshold depolarizing current (a). Determination  
340 of the resting membrane potential (RMP) (n=42) (b) AP amplitude (n=38) (c) AP half duration (n=38)  
341 (d) and AHP amplitude (n=38) (e).

342

343

344

345

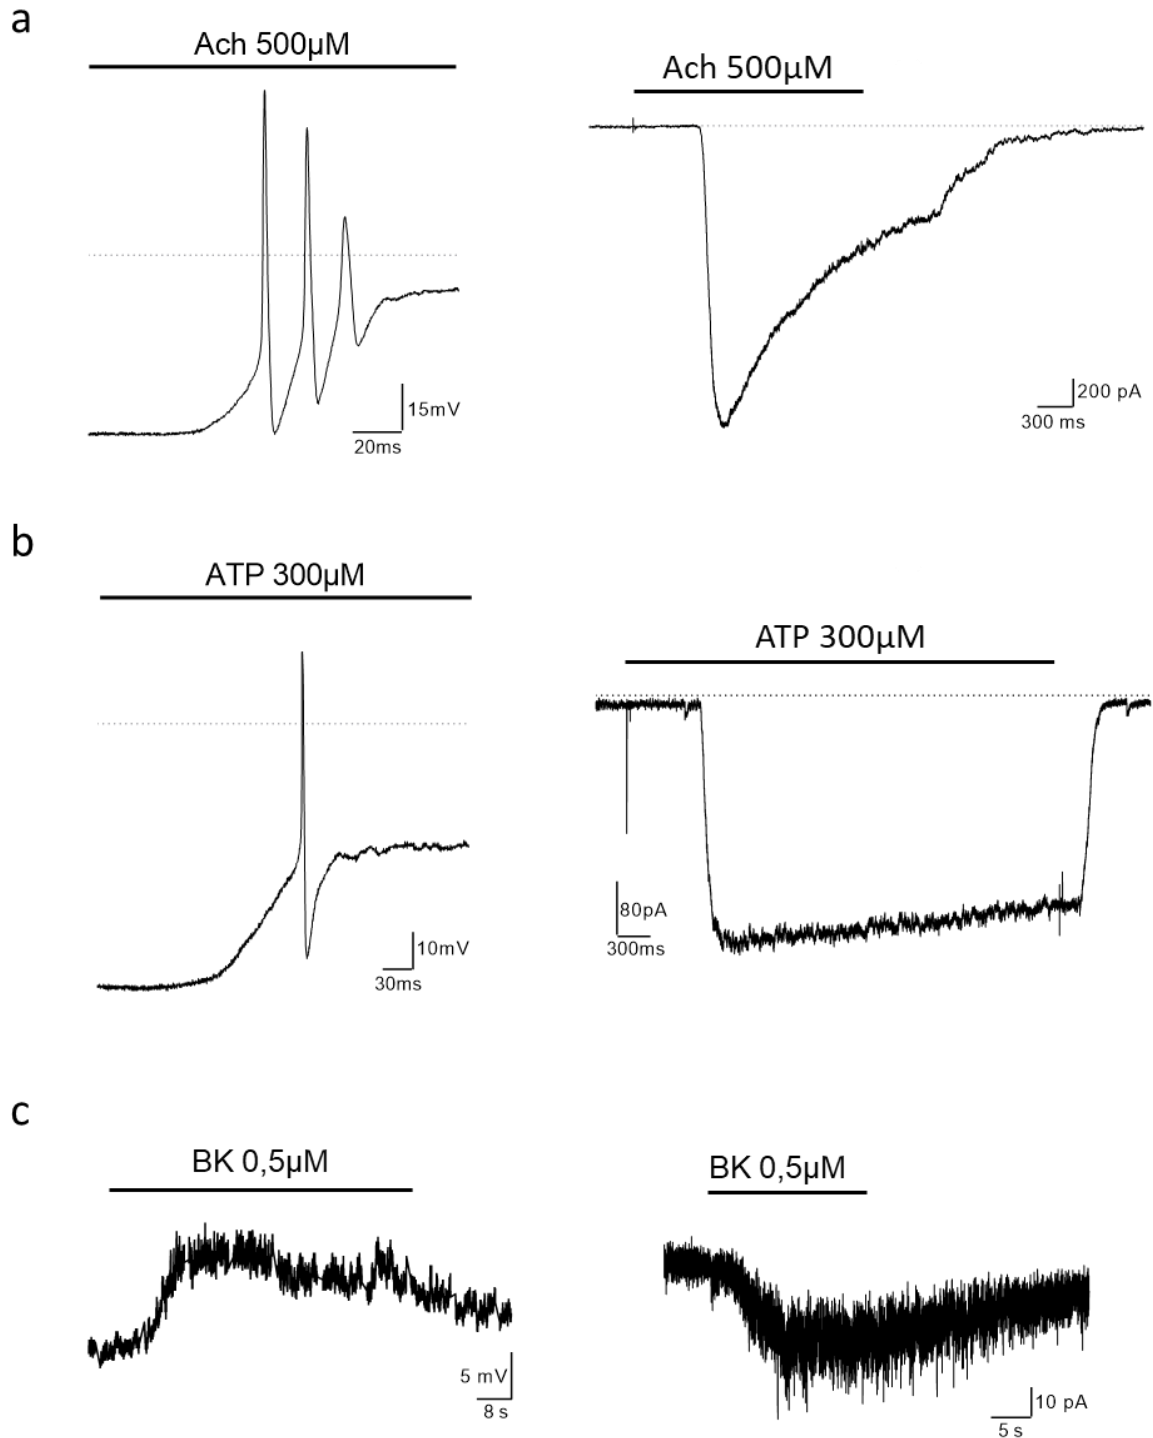

346

347 **Figure 6. Representative traces of pharmacological responses in mouse intracardiac neurons.**

348 Membrane voltage (left) and current (right) responses to Ach (500 μM)(a), ATP (300 μM)(b) and BK

349 (0.5 μM)(c). For voltage clamp experiments HP was -60 mV(a and c) and -50 mV(b).

350

## 351 **References**

- 352 1. Armour JA: The little brain on the heart. *Cleve Clin J Med* 2007; 74 Suppl 1:S48-51.
- 353 2. Maifrino LBM, Liberti EA, Castelucci P, De Souza RR: NADPH- Diaphorase positive cardiac  
354 neurons in the atria of mice. A morphoquantitative study. *BMC Neurosci* 2006; 7:10.
- 355 3. Richardson RJ, Grkovic I, Anderson CR: Immunohistochemical analysis of intracardiac ganglia  
356 of the rat heart. *Cell Tissue Res* 2003; 314:337–350.
- 357 4. Pauziene N, Alaburda P, Rysevaite-Kyguoliene K, et al.: Innervation of the rabbit cardiac  
358 ventricles. *J Anat* 2016; 228:26–46.
- 359 5. Hoover DB, Isaacs ER, Jacques F, Hoard JL, Pagé P, Armour JA: Localization of multiple  
360 neurotransmitters in surgically derived specimens of human atrial ganglia. *Neuroscience* 2009;  
361 164:1170–1179.
- 362 6. Steele PA, Gibbins IL, Morris JL, Mayer B: Multiple populations of neuropeptide-containing  
363 intrinsic neurons in the guinea-pig heart. *Neuroscience* 1994; 62:241–250.
- 364 7. Rysevaite K, Saburkina I, Pauziene N, et al.: IMMUNOHISTOCHEMICAL  
365 CHARACTERIZATION OF THE INTRINSIC CARDIAC NEURAL PLEXUS IN WHOLE-MOUNT  
366 MOUSE HEART PREPARATIONS. *Heart Rhythm* 2011; 8:731–738.
- 367 8. Hoard JL, Hoover DB, Mabe AM, Blakely RD, Feng N, Paolocci N: Cholinergic neurons of  
368 mouse intrinsic cardiac ganglia contain noradrenergic enzymes, norepinephrine transporters, and the  
369 neurotrophin receptors TrkA and p75. *Neuroscience* 2008; 156:129–142.
- 370 9. Wang T, Miller KE: Characterization of Glutamatergic Neurons in the Rat Atrial Intrinsic  
371 Cardiac Ganglia that Project to the Cardiac Ventricular Wall. *Neuroscience* 2016; 329:134–150.
- 372 10. Horackova M, Armour JA, Byczko Z: Distribution of intrinsic cardiac neurons in whole-mount  
373 guinea pig atria identified by multiple neurochemical coding. A confocal microscope study. *Cell Tissue*  
374 *Res* 1999; 297:409–421.

- 375 11. Richardson RJ, Grkovic I, Anderson CR: Cocaine- and amphetamine-related transcript peptide  
376 and somatostatin in rat intracardiac ganglia. *Cell Tissue Res* 2006; 324:17–24.
- 377 12. Calupca MA, Locknar SA, Zhang L, Harrison TA, Hoover DB, Parsons RL: Distribution of  
378 cocaine- and amphetamine-regulated transcript peptide in the guinea pig intrinsic cardiac nervous  
379 system and colocalization with neuropeptides or transmitter synthetic enzymes. *J Comp Neurol* 2001;  
380 439:73–86.
- 381 13. Braas KM, May V, Harakall SA, Hardwick JC, Parsons RL: Pituitary Adenylate Cyclase-  
382 Activating Polypeptide Expression and Modulation of Neuronal Excitability in Guinea Pig Cardiac  
383 Ganglia. *J Neurosci Society for Neuroscience*, 1998; 18:9766–9779.
- 384 14. Selyanko AA: Membrane properties and firing characteristics of rat cardiac neurones in vitro.  
385 *Journal of the Autonomic Nervous System* 1992; 39:181–189.
- 386 15. Xu ZJ, Adams DJ: Resting membrane potential and potassium currents in cultured  
387 parasympathetic neurones from rat intracardiac ganglia. *J Physiol* 1992; 456:405–424.
- 388 16. Edwards FR, Hirst GD, Klemm MF, Steele PA: Different types of ganglion cell in the cardiac  
389 plexus of guinea-pigs. *J Physiol* 1995; 486:453–471.
- 390 17. Xi X, Randall WC, Wurster RD: Electrophysiological properties of canine cardiac ganglion cell  
391 types. *J Auton Nerv Syst* 1994; 47:69–74.
- 392 18. Choi E-K, Shen MJ, Han S, et al.: Intrinsic cardiac nerve activity and paroxysmal atrial  
393 tachyarrhythmia in ambulatory dogs. *Circulation* 2010; 121:2615–2623.
- 394 19. Gibbons DD, Southerland EM, Hoover DB, Beaumont E, Armour JA, Ardell JL:  
395 Neuromodulation targets intrinsic cardiac neurons to attenuate neuronally mediated atrial arrhythmias.  
396 *Am J Physiol Regul Integr Comp Physiol* 2012; 302:R357–R364.
- 397 20. Avazzadeh S, McBride S, O’Brien B, et al.: Ganglionated Plexi Ablation for the Treatment of  
398 Atrial Fibrillation. *J Clin Med* 2020; 9:E3081.

- 399 21. Hoard JL, Hoover DB, Wondergem R: Phenotypic properties of adult mouse intrinsic cardiac  
400 neurons maintained in culture. *American Journal of Physiology-Cell Physiology* 2007; 293:C1875–  
401 C1883.
- 402 22. Renier N, Adams EL, Kirst C, et al.: Mapping of Brain Activity by Automated Volume Analysis  
403 of Immediate Early Genes. *Cell Elsevier*, 2016; 165:1789–1802.
- 404 23. Belle M, Godefroy D, Couly G, et al.: Tridimensional Visualization and Analysis of Early  
405 Human Development. *Cell Elsevier*, 2017; 169:161-173.e12.
- 406 24. Armour JA, Ardell JL: *Basic and Clinical Neurocardiology*. Oxford University Press, 2004.
- 407 25. Ma B, Ruan H-Z, Burnstock G, Dunn PM: Differential expression of P2X receptors on neurons  
408 from different parasympathetic ganglia. *Neuropharmacology* 2005; 48:766–777.
- 409 26. Rysevaite K, Saburkina I, Pauziene N, Noujaim SF, Jalife J, Pauza DH: Morphologic pattern of  
410 the intrinsic ganglionated nerve plexus in mouse heart. *Heart Rhythm* 2011; 8:448–454.
- 411 27. Rajendran PS, Challis RC, Fowlkes CC, et al.: Identification of peripheral neural circuits that  
412 regulate heart rate using optogenetic and viral vector strategies. *Nat Commun* **10**, 1944 (2019).
- 413 28. Yokoyama T, Lee J-K, Miwa K, et al.: Quantification of sympathetic hyperinnervation and  
414 denervation after myocardial infarction by three-dimensional assessment of the cardiac sympathetic  
415 network in cleared transparent murine hearts. *PLoS One* 12(7): e0182072.
- 416 29. Fukuda K, Kanazawa H, Aizawa Y, Ardell JL, Shivkumar K: Cardiac Innervation and Sudden  
417 Cardiac Death. *Circ Res* 2015; 116:2005–2019.
- 418 30. Furness JB, Trussell DC, Pompolo S, Bornstein JC, Smith TK: Calbindin neurons of the guinea-  
419 pig small intestine: quantitative analysis of their numbers and projections. *Cell Tissue Res* 1990;  
420 260:261–272.
- 421 31. Tan CMJ, Green P, Tapoulal N, Lewandowski AJ, Leeson P, Herring N: The Role of  
422 Neuropeptide Y in Cardiovascular Health and Disease. *Front Physiol* 2018; 9: 1281.

- 423 32. Ekblad E: CART in the enteric nervous system. *Peptides* 2006; 27:2024–2030.
- 424 33. Arichi S, Sasaki-Hamada S, Kadoya Y, Ogata M, Ishibashi H: Excitatory effect of BK on  
425 intrinsic neurons of the rat heart. *Neuropeptides* 2019; 75:65–74.
- 426 34. Scalco A, Moro N, Mongillo M, Zaglia T: Neurohumoral Cardiac Regulation: Optogenetics  
427 Gets Into the Groove. *Frontiers in Physiology* 2021; 12:1323.
- 428
